# Supplementary material
Source: PubMed Central journal article supplement (PMC3494399)
Supplement: cr201297x2.pdf [file cr201297x2.pdf]

## Supplementary information, Figure S2

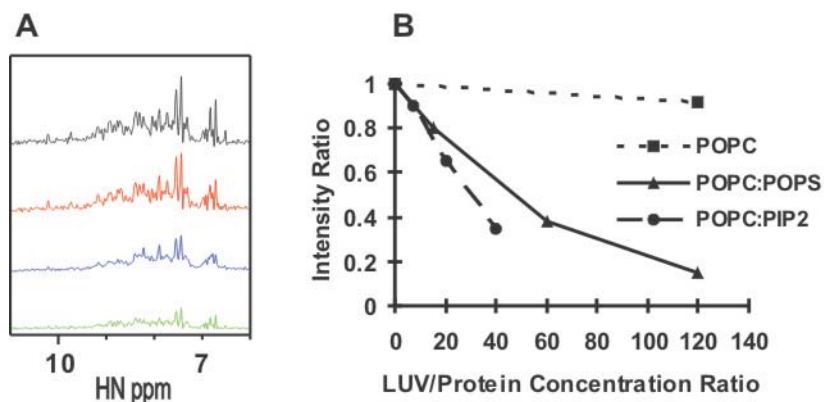

**Figure S2** Membrane enriched with negatively-charged lipids favorably interacts with talin-F2F3. **(A)** 1D <sup>1</sup>H projections of 0.04 mM <sup>15</sup>N-labeled talin-F2F3 HSQC spectra in the absence (black) and presence of LUVs composed of 5 mM POPC (red), or 5 mM 9:1 POPC:POPS (blue), or 2.5 mM 19:1 POPC:PIP2 (green). Significant signal reduction is observed in the presence of POPS or PIP2, but not pure POPC. **(B)** The average HSQC signal intensity ratios of 0.04 mM <sup>15</sup>N-labeled talin-F2F3 with increasing amount of LUVs composed of 5 mM POPC (square), or 5 mM 9:1 POPC:POPS (triangle), or 2.5 mM 19:1 POPC:PIP2 (circle). Ratio close to 1 suggests weak interaction and ratio close to 0 implies strong interaction.
