# Supplementary material
Source: PubMed Central journal article supplement (PMC3494399)
Supplement: cr201297x3.pdf [file cr201297x3.pdf]

Supplementary information, Figure S3

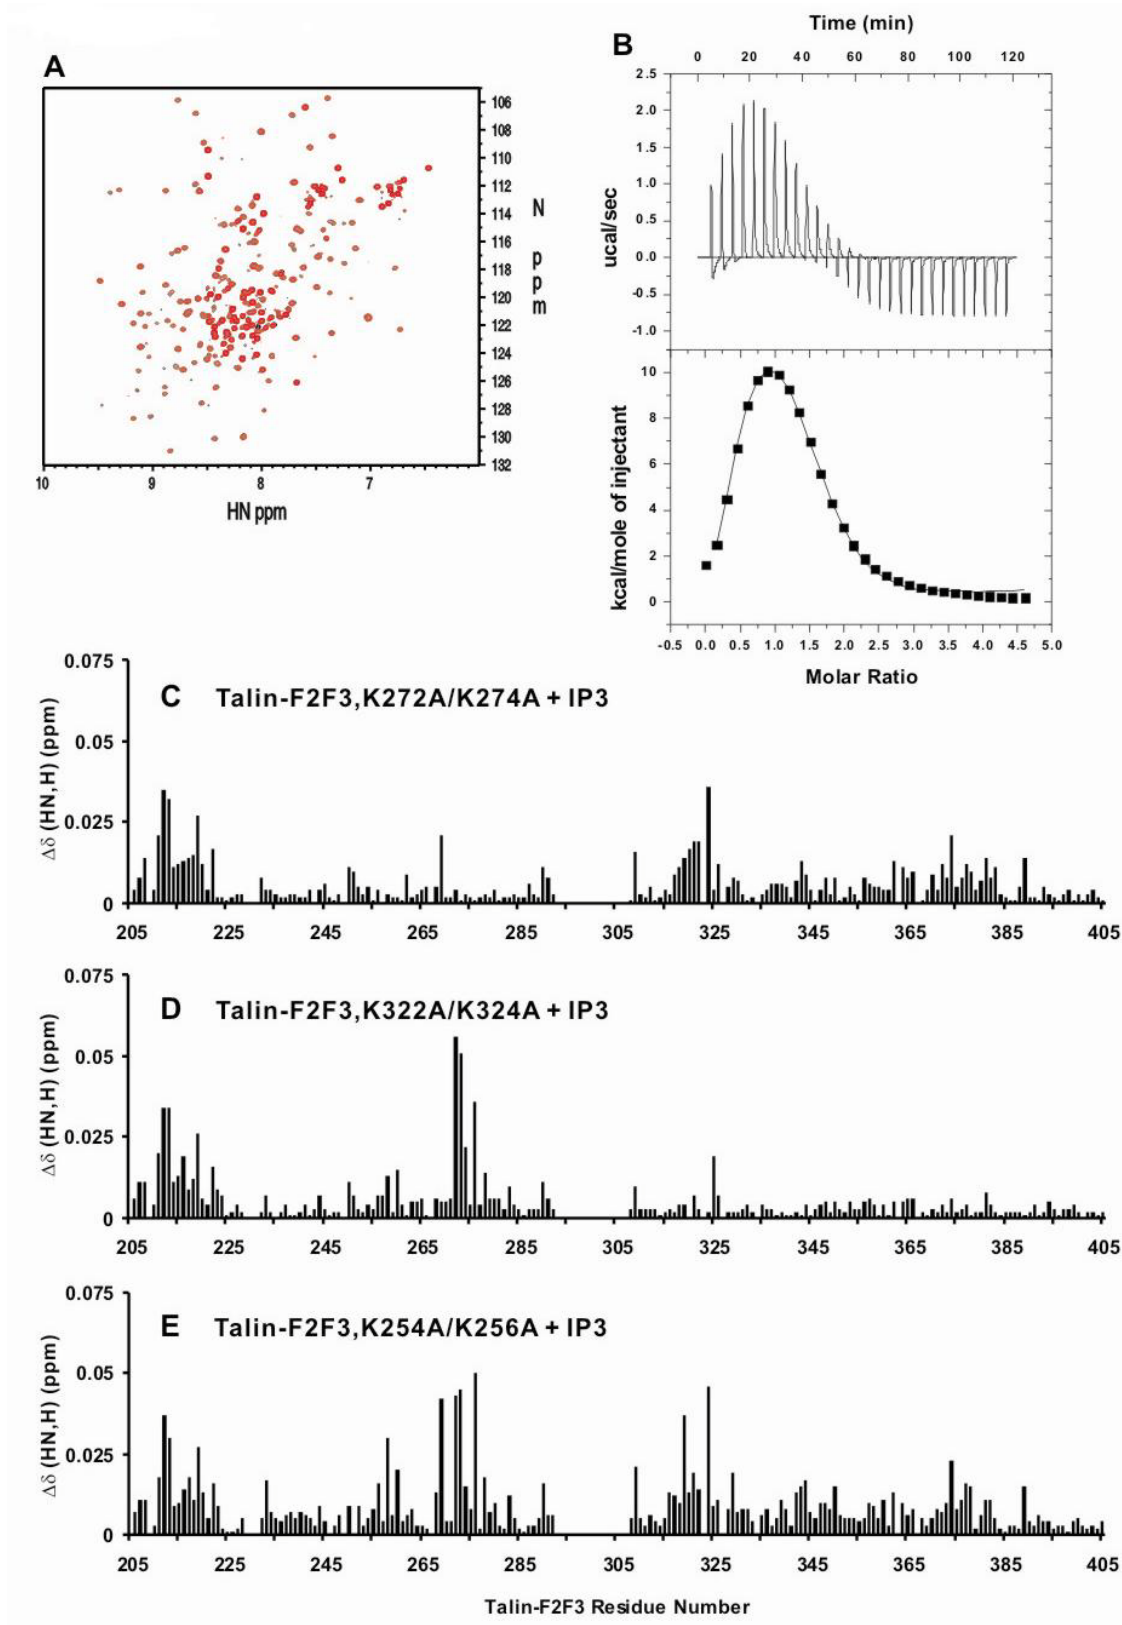

**Figure S3** Properties of talin subdomain binding to PIP2. **(A)** Overlay of 0.04 mM  $^{15}\text{N}$ -labeled talin-F0F1 in the absence (black) and presence of 0.2 mM IP4, showing no perturbation. Addition of 2.5 mM 19:1 POPC:PIP2 LUV also had little effect (not shown). **(B)** ITC measurement for Talin-H and PIP2-diC8 interaction. The upper panel shows the raw data and bottom panel shows that the data (square) fit very well with a 1:2 molar ratio binding event (curve), which is consistent with the NMR perturbation study (see the text) and recent functional analysis [15]. The  $K_D$  for first binding site is  $0.4 \pm 0.1 \mu\text{M}$  and  $5.0 \pm 0.5 \mu\text{M}$  for second binding site. The enthalpy and entropy changes are:  $\Delta H_1 = -9.4 \text{ kcal/mol}$ ,  $\Delta H_2 = 17.3 \text{ kcal/mol}$ ,  $\Delta S_1 = -4.11 \text{ cal/(mol}\cdot\text{K)}$ , and  $\Delta S_2 = 82.2 \text{ cal/(mol}\cdot\text{K)}$ . **(C-E)** Chemical shift plot of IP3 binding to various talin-F2F3 mutants. The patterns are similar to those for IP4 (see Figure 3C-3E).
