# Supplementary material
Source: PubMed Central journal article supplement (PMC3494399)
Supplement: cr201297x5.pdf [file cr201297x5.pdf]

Supplementary information, Figure S5

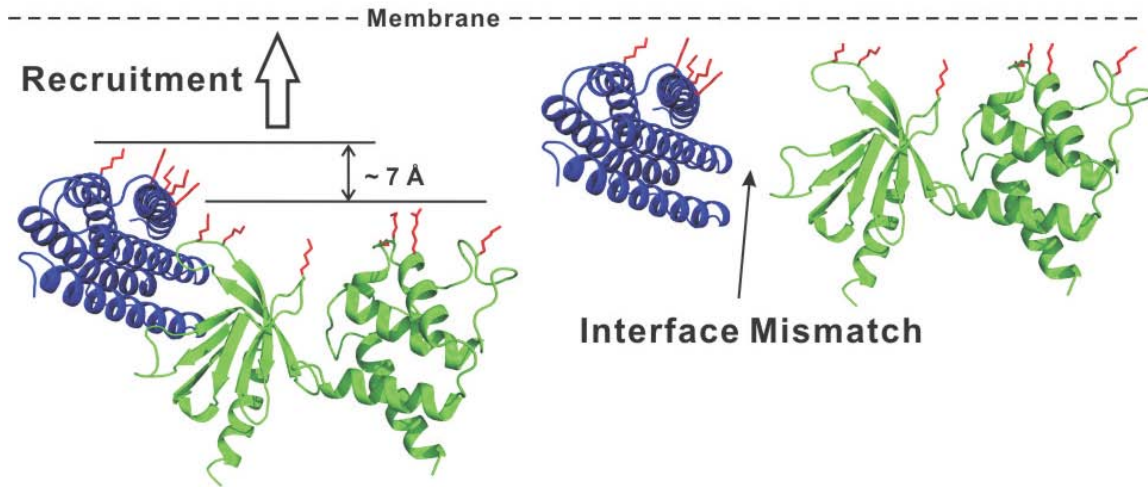

**Figure S5** A model showing how talin-RS 5EtoK mutations promote the talin recruitment to membrane (left panel). Upon the talin-RS 5EtoK binding to membrane, Talin-F2F3 has to further move  $\sim 7\text{\AA}$  upward based on our crystal structure to bind membrane, thereby causing the mismatch and disruption of the talin-F2F3/talin-RS interface (right panel) and subsequent relief of talin autoinhibition, which explains the data in Figure 4C.
